# Supplementary material for: Guidelines for the symptomatic management of fever in children: systematic review of the literature and quality appraisal with AGREE II
Source: PubMed Central journal article supplement — BMJ Open. 2017 Jul 31;7(7):e015404. doi: 10.1136/bmjopen-2016-015404 (PMC5642818; doi:10.1136/bmjopen-2016-015404), 2017-07-31
Supplement: bmjopen-2016-015404supp001.pdf [file bmjopen-2016-015404supp001.pdf]

**Search terms: 26/07/2016**

**Publication from January 2010 to July 2016**

**PUBMED**

((("Guidelines as Topic"[MeSH Terms]) AND "Fever"[MeSH Terms]) AND "Child"[MeSH Terms]) AND "Antipyretics"[MeSH Terms]

**GOOGLE SCHOLAR**

[allintitle]: "fever" AND "children" AND "antipyretic";

[allintitle]: "fever" AND "children" AND "antipyretic" AND "guideline";

[allintitle]: "fever" AND "children" AND "management".

**GUIDELINES INTERNATIONAL NETWORK**

"guideline" AND "fever" AND "children" AND "antipyretic"

**NATIONAL GUIDELINE CLEARINGHOUSE**

"guideline" AND "fever" AND "children" AND "antipyretic"

**NATIONAL INSTITUTE FOR HEALTH AND CARE EXCELLENCE**

"guideline" AND "fever" AND "children" AND "antipyretic"

**AUSTRALIAN CLINICAL PRACTICE GUIDELINES**

"guideline" AND "fever" AND "children" AND "antipyretic"

**SCOTTISH INTERCOLLEGIATE GUIDELINES NETWORK (SIGN)**

"guideline" AND "fever" AND "children" AND "antipyretic"

**WORLD HEALTH ORGANIZATION**

"guideline" AND "fever" AND "children" AND "antipyretic"
